# Supplementary material for: Metacognitive impairments extend perceptual decision making weaknesses in compulsivity
Source: PubMed Central journal article supplement (PMC5529539; doi:10.1038/s41598-017-06116-z), 2017-07-26
Supplement: 41598_2017_6116_MOESM1_ESM.pdf [file 41598_2017_6116_MOESM1_ESM.pdf]

# **Metacognitive impairments extend perceptual decision making weaknesses in compulsivity**

Tobias U. Hauser, Micah Allen, NSPN Consortium, Geraint Rees & Raymond J. Dolan

## **Supplementary Information**

### **Content:**

Table S1. HDDM model comparison

Figure S1. Binned confidence ratings

Neuroscience in Psychiatry Network (NSPN) Consortium author list

**Table S1.** HDDM model comparison. Model comparison revealed an improved fit for models that allow the orientation of the stimuli to modulate drift rate ('orientation→drift'). Additionally, models that included the group membership improved model fit. This was especially so when the group factor interacted with the orientation effect on the drift rate (orientation\*group→drift). Best fitting model highlighted in bold.

| <b>model</b>                                | <b>DIC</b>  |
|---------------------------------------------|-------------|
| basic model                                 | 3670        |
| orientation→drift                           | 3524        |
| orientation+group→drift                     | 3523        |
| <b>orientation*group→drift</b>              | <b>3517</b> |
| orientation→drift, group→threshold          | 3524        |
| orientation*group→drift,<br>group→threshold | 3519        |

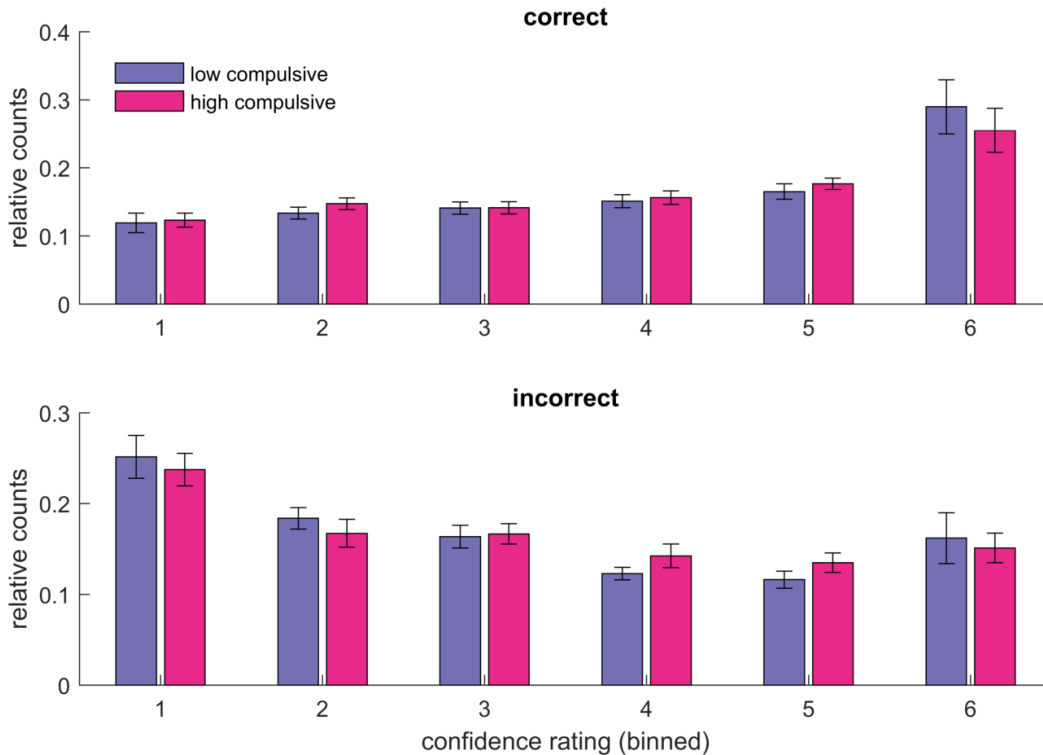

**Figure S1.** Binned confidence ratings. Deriving metacognitive measures without using a computational model is difficult, because these confidence ratings are inherently subject to a range of distortions, including rating and perceptual performance biases. However, to approximate the model-based results that we found in our main analysis, we used linear regressions to predict the relationship between perceptual performance (correct vs incorrect) and binned confidence rating (left: lowest confidence, right: highest confidence). We used a summary statistics approach to estimate the slope of how often a particular confidence was expressed, given true performance. These slopes were independently estimated for correct and incorrect trials, and the difference of these slopes were then compared between the groups. Such a measure is a rough indicator for how much a participant distinguishes between correct and incorrect decision and can only be used as a model-free approximation for metacognitive performance. Indeed, we found a positive slope for correct decisions (low compulsives:  $z(196)=3.40$ ,  $p<.001$ ; high compulsives:  $z(167)=3.55$ ,  $p<.001$ ) and a negative slope for incorrect decisions (low compulsives:  $z(41)=-2.39$ ,  $p=.017$ ; high compulsives:  $z(24)=-2.68$ ,  $p=.007$ ) for both groups. A group comparison showed that high compulsive participants show (at a trend level significance) less distinction in the slopes between correct and incorrect trials in terms of confidence ratings (slope difference: low compulsives:  $0.05\pm 0.02$ ; high compulsives:  $0.04\pm 0.03$ ;  $z(456)=1.91$ ,  $p=0.056$ ). This finding supports the main analysis of a lower metacognitive efficiency in high compulsive participants.

## Neuroscience in Psychiatry Network (NSPN) Consortium author list

### Principal investigators:

Edward T. Bullmore<sup>5-8</sup> (chief investigator from 01/01/2017)

Ian Goodyer<sup>5,6</sup> (chief investigator until 01/01/2017)

Peter Fonagy<sup>9</sup>

Peter Jones<sup>5,6</sup>

### Associated faculty:

Pasco Fearon<sup>9</sup>

### Project managers:

Gita Prabhu<sup>1,2</sup>

### Postdoctoral research associates and associated research fellows:

Michael Moutoussis<sup>1,2</sup>

Michelle St Clair<sup>5</sup>

### Research assistants:

Kalia Cleridou<sup>10</sup>

Hina Dadabhoy<sup>10</sup>

Sian Granville<sup>10</sup>

Elizabeth Harding<sup>10</sup>

Alexandra Hopkins<sup>1,2,10</sup>

Daniel Isaacs<sup>10</sup>

Janchai King<sup>10</sup>

Danae Kokorikou<sup>10</sup>

Harriet Mills<sup>10</sup>

Sara Pantaleone<sup>10</sup>

<sup>5</sup> Department of Psychiatry, University of Cambridge, Cambridge CB2 0SZ, United Kingdom

<sup>6</sup> Cambridgeshire and Peterborough National Health Service Foundation Trust, Cambridge, CB21 5EF, United Kingdom

<sup>7</sup> Medical Research Council/Wellcome Trust Behavioural and Clinical Neuroscience Institute, University of Cambridge, Cambridge CB2 3EB, United Kingdom

<sup>8</sup> ImmunoPsychiatry, GlaxoSmithKline Research and Development, Stevenage SG1 2NY, United Kingdom

<sup>9</sup> Research Department of Clinical, Educational and Health Psychology, University College London, London WC1E 6BT, United Kingdom

<sup>10</sup> Anna Freud National Centre for Children and Families, 12 Maresfield Gardens, London NW3 5SU, United Kingdom

### *Conflict of interest for NSPN members:*

E.T.B. is employed half-time by the University of Cambridge and half-time by GlaxoSmithKline and holds stock in GlaxoSmithKline.
